# Supplementary material for: The Gut Microbiota of Healthy Aged Chinese Is Similar to That of the Healthy Young
Source: PubMed Central journal article supplement (PMC5615133; doi:10.1128/msphere.00327-17), 2017-09-27

**A: All sample PCA with all OTUs**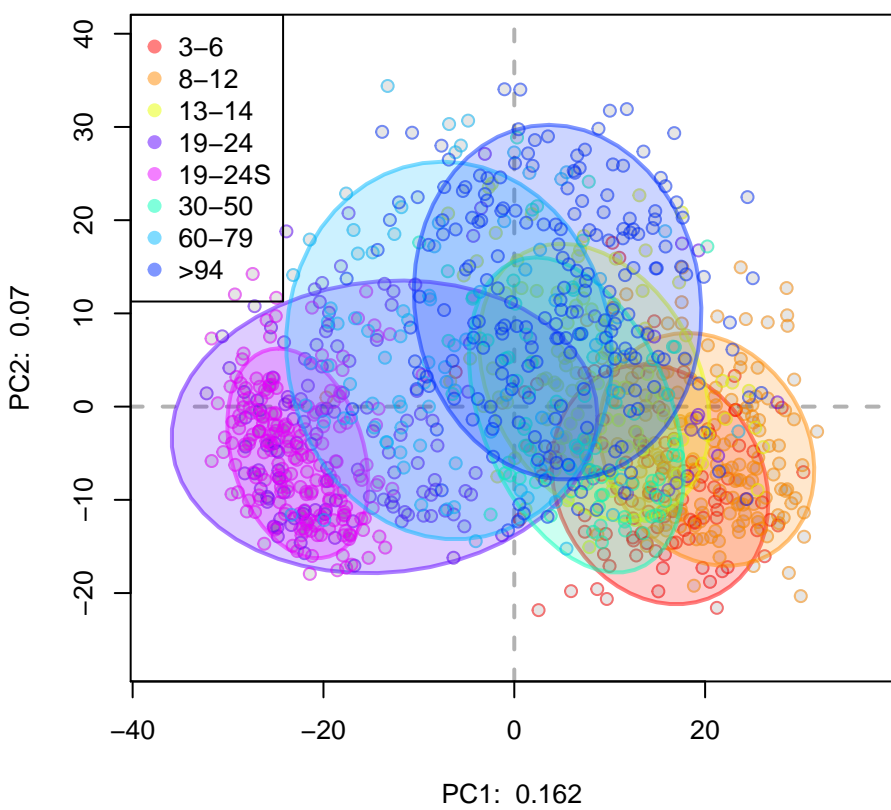**B: dendrogram**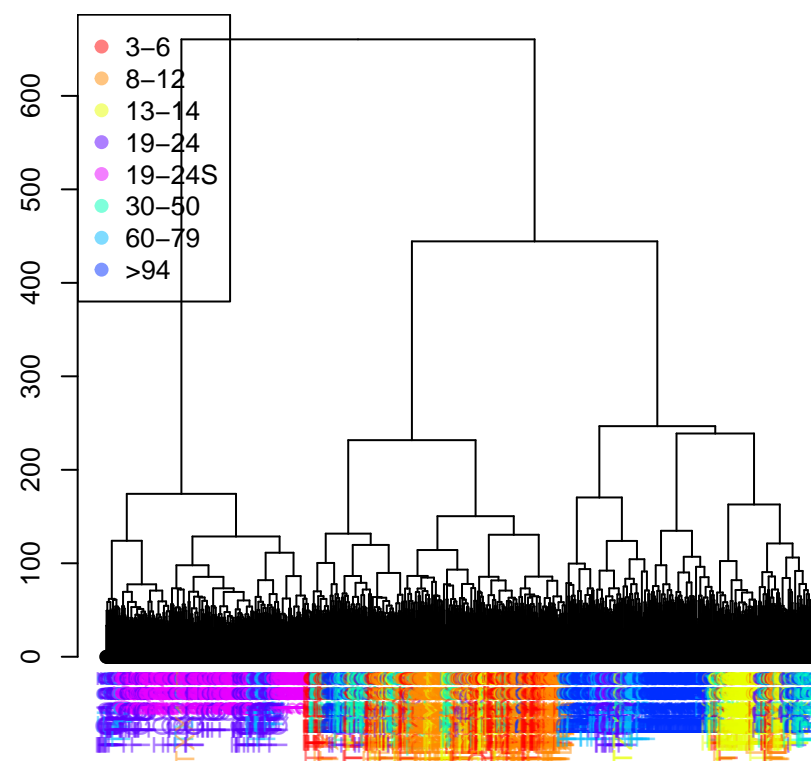**C: Samples**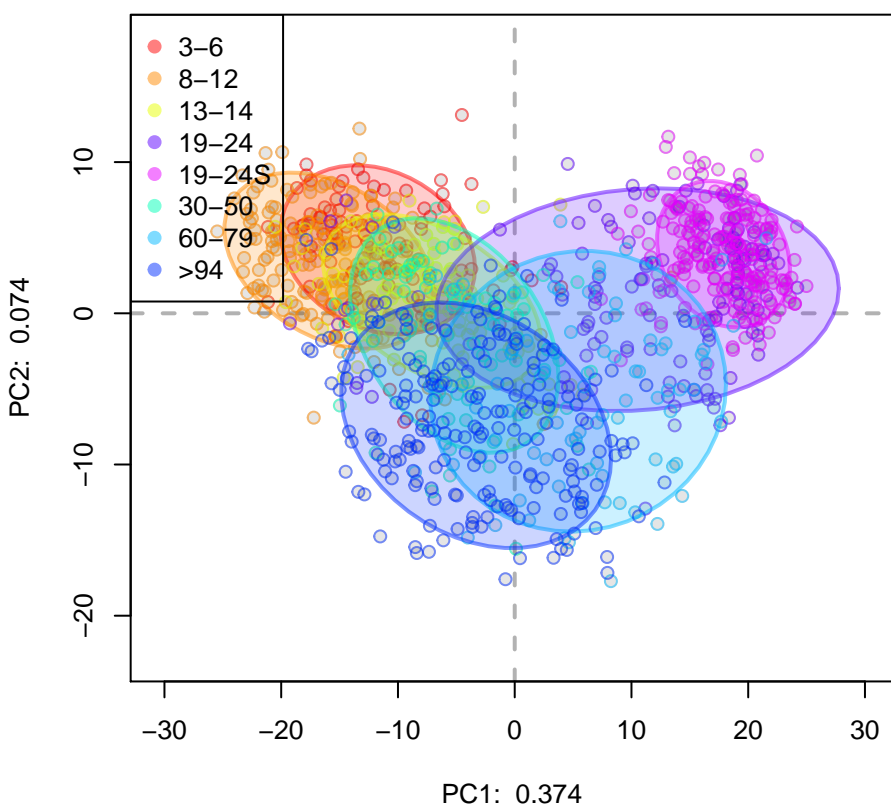**D: OTU loadings**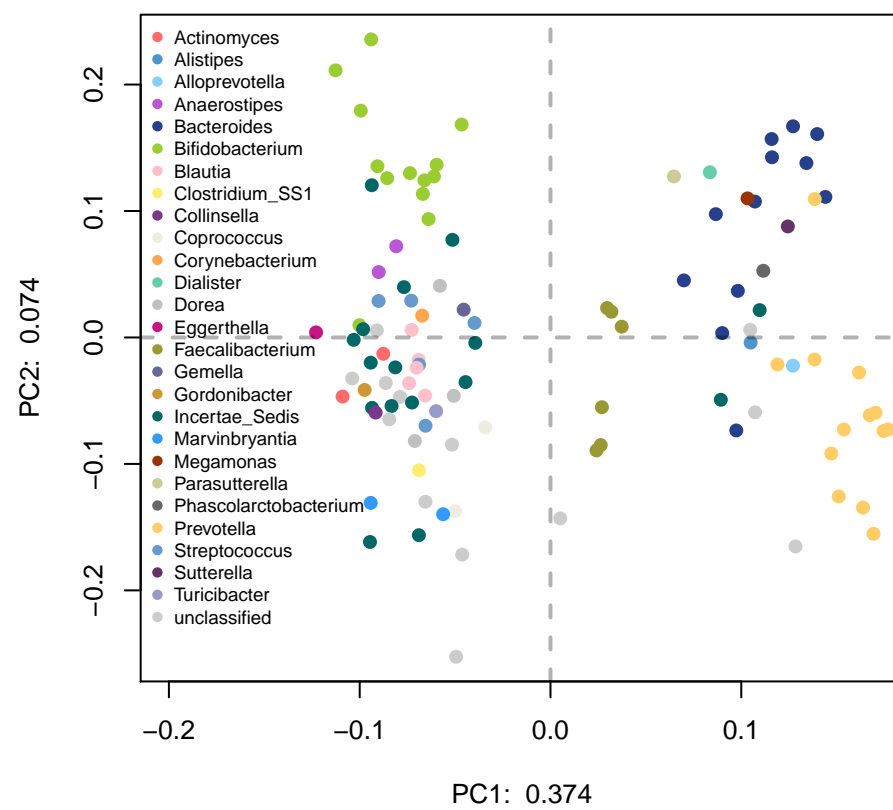

Supplement: sph005172374sf2.pdf [file sph005172374sf2.pdf]
